# Supplementary material for: Phenolics Isolated from Aframomum meleguta Enhance Proliferation and Ossification Markers in Bone Cells
Source: PubMed Central journal article supplement (PMC6151453; doi:10.3390/molecules22091467), 2017-09-04
Supplement: molecules-22-01467-s001.pdf [file molecules-22-01467-s001.pdf]

## **Supplementary data**

### **Phenolics isolated from *Aframomum meleguta* enhance proliferation and ossification markers in bone cells**

**Ashraf B. Abdel-Naim <sup>1,2</sup>, Abdullah A. Alghamdi <sup>3</sup>, Mardi M. Algandaby <sup>1,4</sup>,**

**Fahad A. Al-Abbasi <sup>1,3</sup>, Ahmed M. Al-Abd <sup>2,5</sup>, Hossam M. Abdallah <sup>6,7</sup>,**

**Ali M. El-Halawany <sup>7</sup>, Masao Hattori <sup>8</sup>**

Dr. Hossam  
Sample : A-5 CDCL3

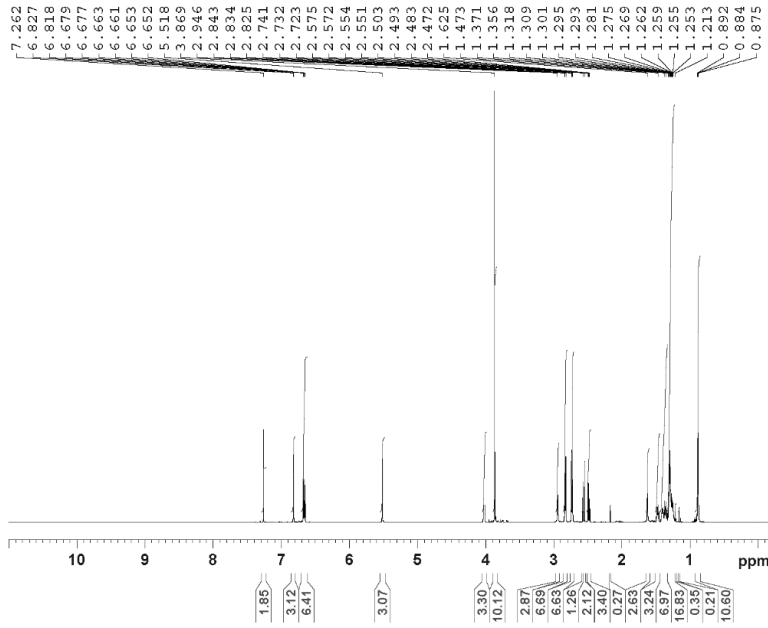

Current Data Parameters  
NAME HOGSAM A-5 18-05-2015  
EXPNO 10  
PROCNO 1

F2 - Acquisition Parameters  
Date\_ 20160528  
Time 20.25  
INSTRUM spect  
PROBHD 5 mm CPQCI 1H-  
PULPROG zg30  
TD 65536  
SOLVENT CDCl3  
NS 20  
DS 2  
SWH 17006.803 Hz  
FIDRES 0.255003 Hz  
AQ 1.9267584 sec  
RG 9.04  
DM 29.400 usec  
DE 10.00 usec  
TE 298.2 K  
D1 1.00000000 sec  
TDO

\*\*\*\*\* CHANNEL f1 \*\*\*\*\*  
SFO1 850.1552500 MHz  
NUC1 1H  
P1 6.00 usec  
PLM1 15.30000019 W

F2 - Processing parameters  
SI 65536  
SF 850.1500200 MHz  
WDW EM  
SSB 0  
LB 0.30 Hz  
GB 0  
PC 2.00

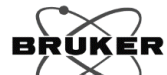

Dr. Hossam  
Sample : A-5 CDCL3

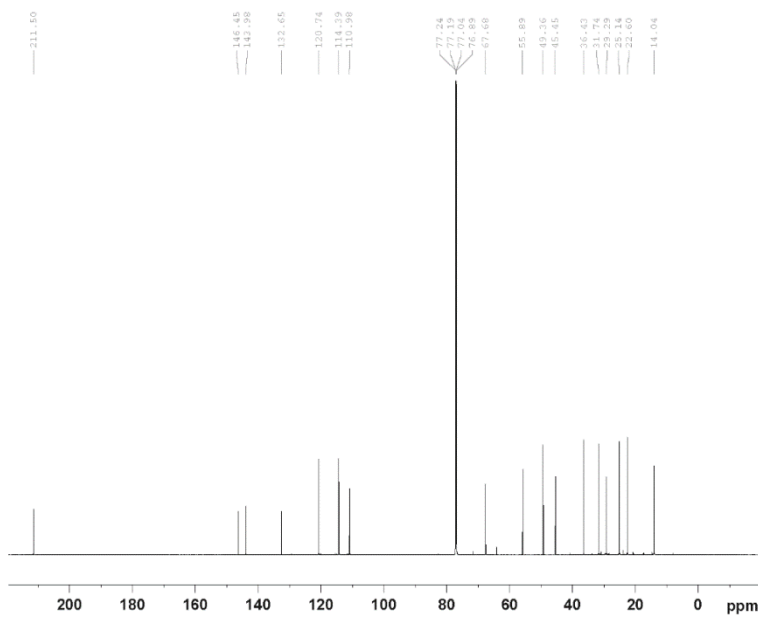

Current Data Parameters  
NAME HOGSAM A-5 04-06-2015  
EXPNO 10  
PROCNO 1

F2 - Acquisition Parameters  
Date\_ 20160605  
Time 18.40  
INSTRUM spect  
PROBHD 5 mm CPQCI 1H-  
PULPROG zgpg30  
TD 65536  
SOLVENT CDCl3  
NS 2500  
DS 4  
SWH 51020.406 Hz  
FIDRES 0.770810 Hz  
AQ 0.6422528 sec  
RG 186.93  
DM 9.800 usec  
DE 18.00 usec  
TE 298.2 K  
D1 2.00000000 sec  
L11 0.03000000 sec  
TDO 1

\*\*\*\*\* CHANNEL f1 \*\*\*\*\*  
SFO1 213.7217436 MHz  
NUC1 13C  
P1 12.00 usec  
PLM1 130.00000000 W

\*\*\*\*\* CHANNEL f2 \*\*\*\*\*  
SFO2 850.1534006 MHz  
NUC2 1H  
CDPRG2 waltz16  
SFO2 80.00 usec  
PLM2 13.00000019 W  
PLM12 0.13800000 W  
PLM13 0.09832000 W

F2 - Processing parameters  
SI 32768  
SF 213.7703875 MHz  
WDW EM  
SSB 0  
LB 1.50 Hz  
GB 0  
PC 2.00

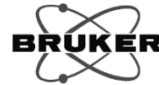

**Figure S1.** <sup>1</sup>H and <sup>13</sup>C NMR charts of 6-gingerol  
(Samples were recorded on DRX-850 spectrometer (Bruker BioSpin, Billerica, MA, USA)).

Dr.Hossam  
Sample : PARADOL CDCL3

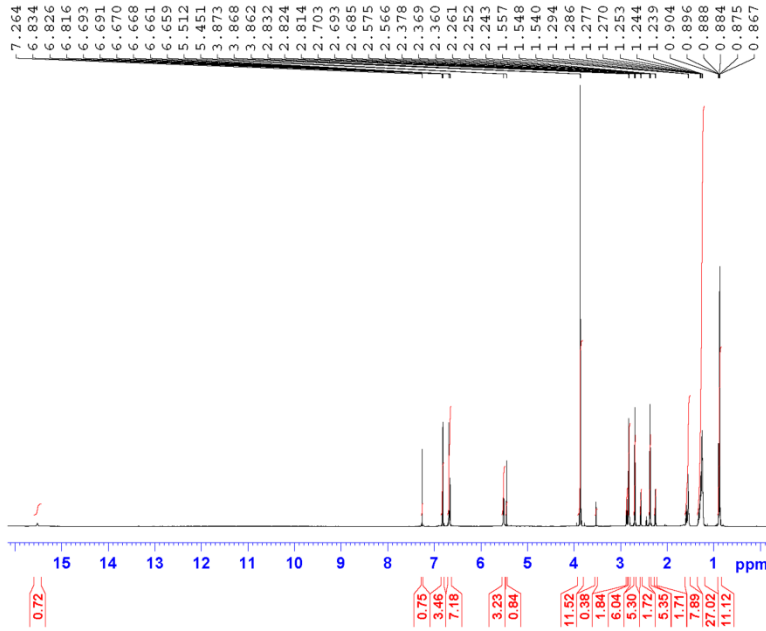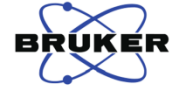

Current Data Parameters  
NAME HOSSAM PARADOL 21-01-2015  
EXPNO 10  
PROCNO 1

F2 - Acquisition Parameters  
Date\_ 20150121  
Time 13:40  
INSTRUM spect  
PROBHD 5 mm CPQCI 1H-  
PULPROG zgpg30  
TD 65536  
SOLVENT CDCL3  
NS 32  
DS 2  
SFO1 17006.803 Hz  
FIDRES 0.159653 Hz  
AQ 1.9267584 sec  
RG 7.85  
DM 29.460 usec  
DE 10.00 usec  
TE 298.0 K  
D1 1.00000000 sec  
TD0 1

----- CHANNEL f1 -----  
SFO1 850.1552500 MHz  
NUC1 1H  
P1 8.00 usec  
PLM1 15.30000019 H

F2 - Processing parameters  
SI 65536  
SF 850.1500185 MHz  
WDW EM  
SSB 0  
LB 0.30 Hz  
GB 0  
PC 2.00

Dr.Hossam  
Sample : PARADOL CDCL3

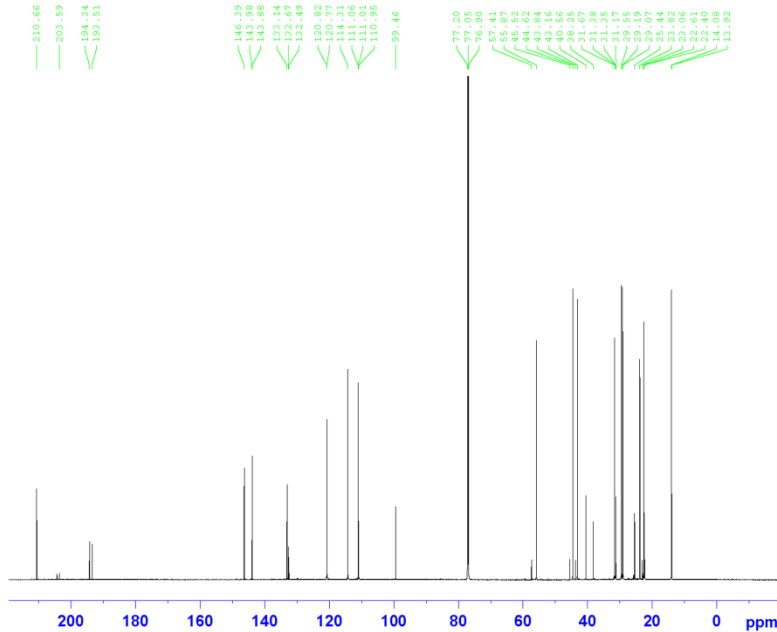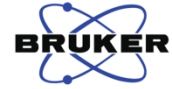

Current Data Parameters  
NAME HOSSAM PARADOL 27-01-2015  
EXPNO 40  
PROCNO 1

F2 - Acquisition Parameters  
Date\_ 20150127  
Time 18:52  
INSTRUM spect  
PROBHD 5 mm CPQCI 1H-  
PULPROG zgpg30  
TD 65536  
SOLVENT CDCL3  
NS 4096  
DS 4  
SFO1 51020.406 Hz  
FIDRES 0.778810 Hz  
AQ 0.642528 sec  
RG 186.93  
DM 2.800 usec  
DE 18.00 usec  
TE 298.0 K  
D1 2.00000000 sec  
D11 0.03000000 sec  
TD0 1

----- CHANNEL f1 -----  
SFO1 213.7917434 MHz  
NUC1 13C  
P1 12.00 usec  
PLM1 130.00000000 H

----- CHANNEL f2 -----  
SFO2 850.1534906 MHz  
NUC2 1H  
CPDPRG2 waltz16  
PCPD2 80.00 usec  
PLM2 13.80000019 H  
PLM12 0.13800000 H  
PLM13 0.98832000 H

F2 - Processing parameters  
SI 32768  
SF 213.7703875 MHz  
WDW EM  
SSB 0  
LB 1.50 Hz  
GB 0  
PC 2.00

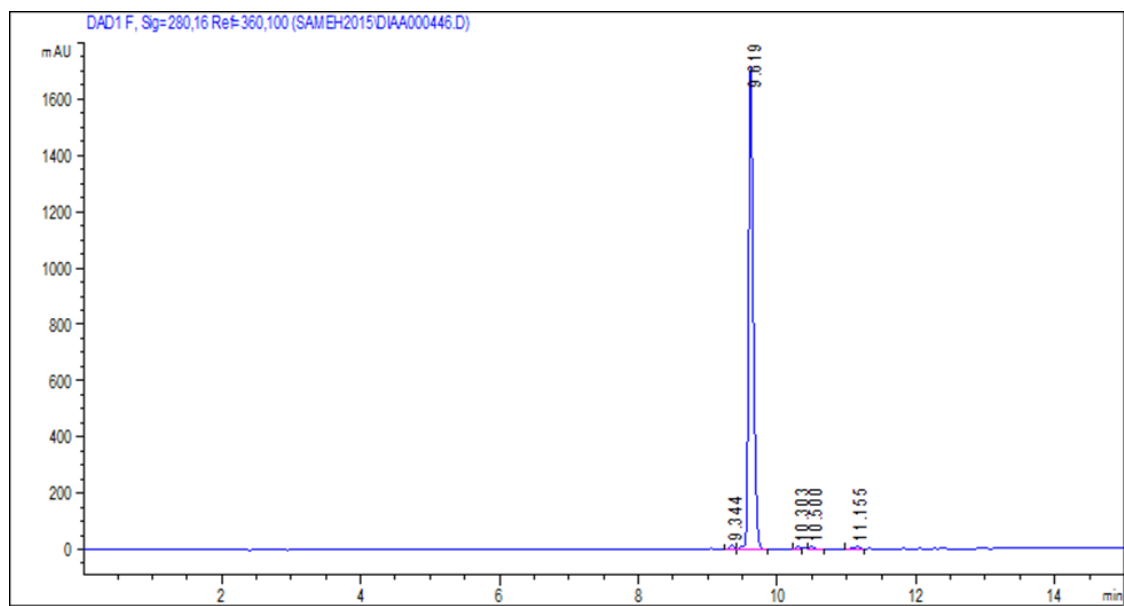

**Figure S2.**  $^1\text{H}$  and  $^{13}\text{C}$  NMR charts and HPLC chromatogram of **6-paradol** (Samples were recorded on DRX-850 spectrometer (Bruker BioSpin, Billerica, MA, USA)).

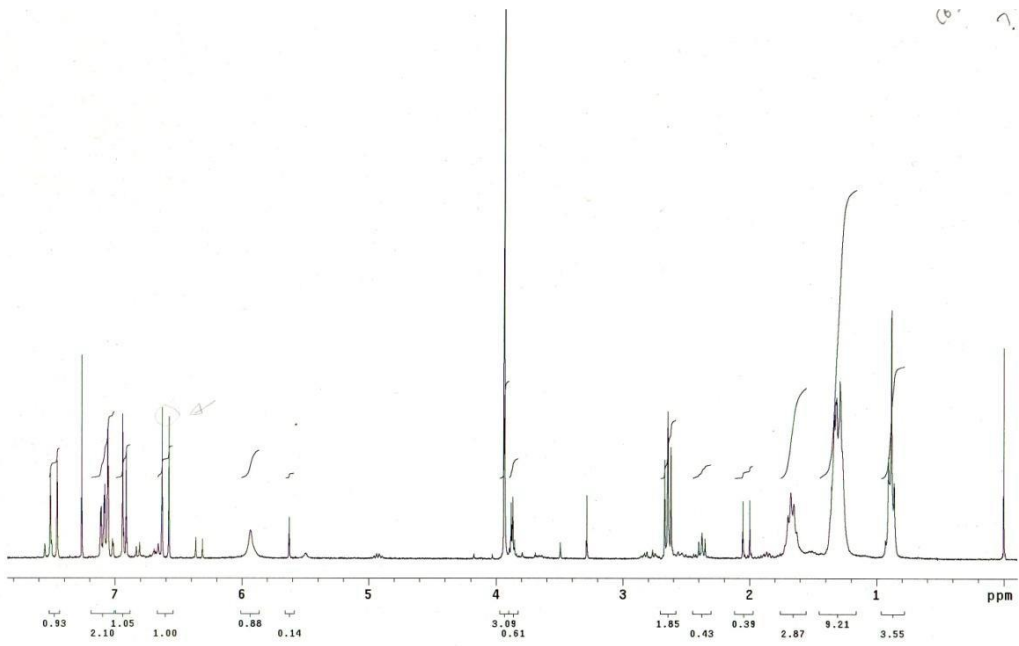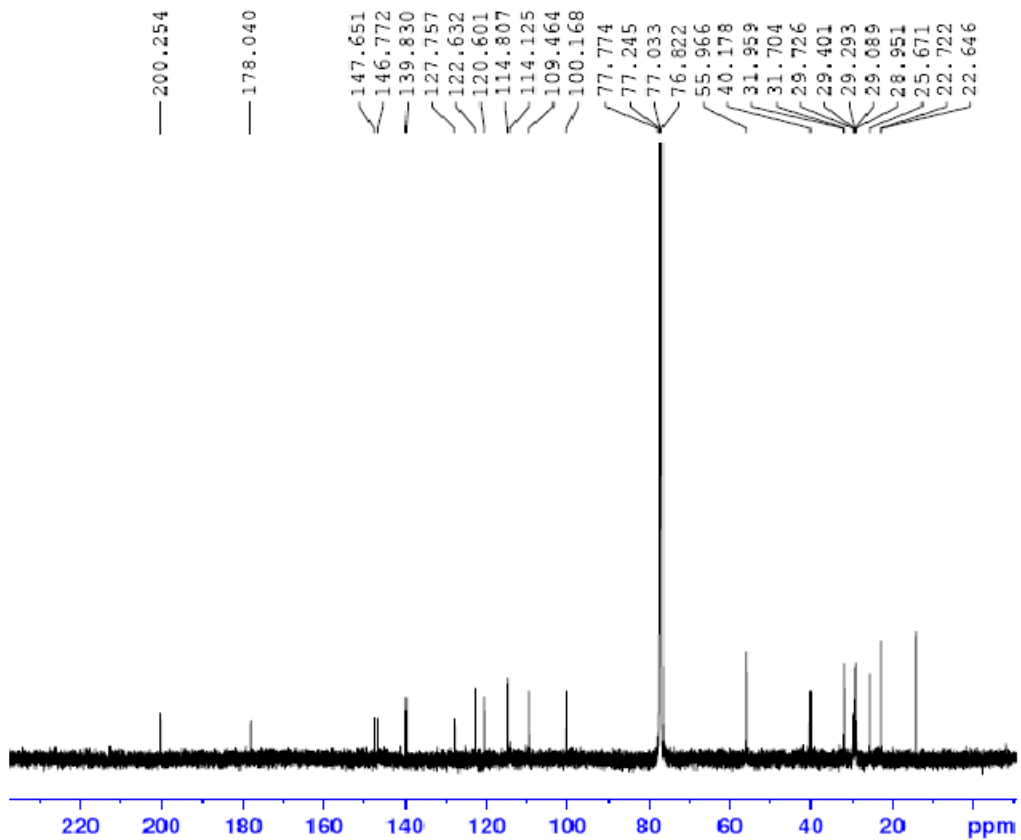

Scan: 84  
Base: m/z 177; 16.2%FS TIC: 6148640

R.T.: 2.1

#Ions: 460

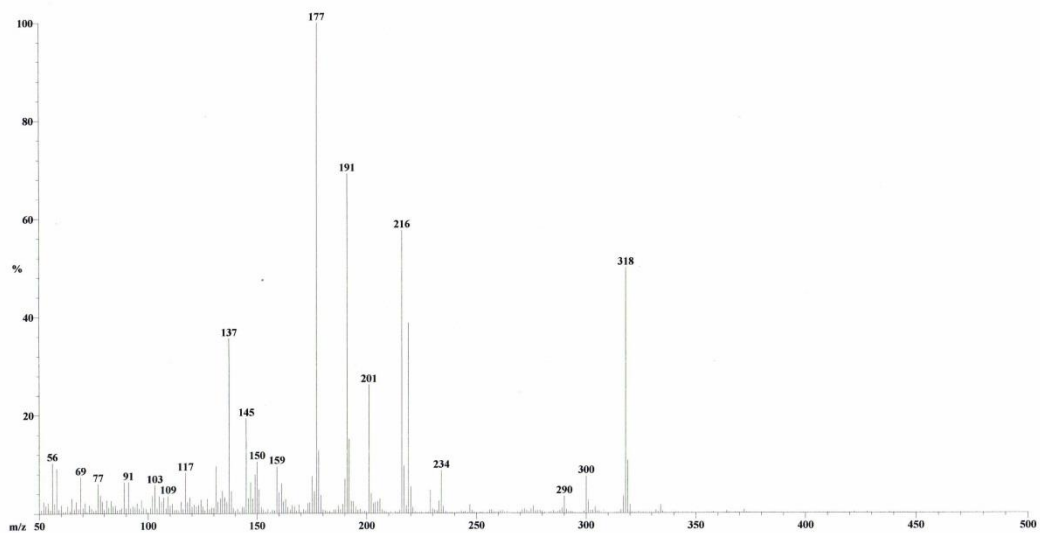

**Figure S3.**  $^1\text{H}$  and  $^{13}\text{C}$  NMR and Ms Charts of 8-dehydrogingerdione (3)

3-7-3  
[8] gingerol

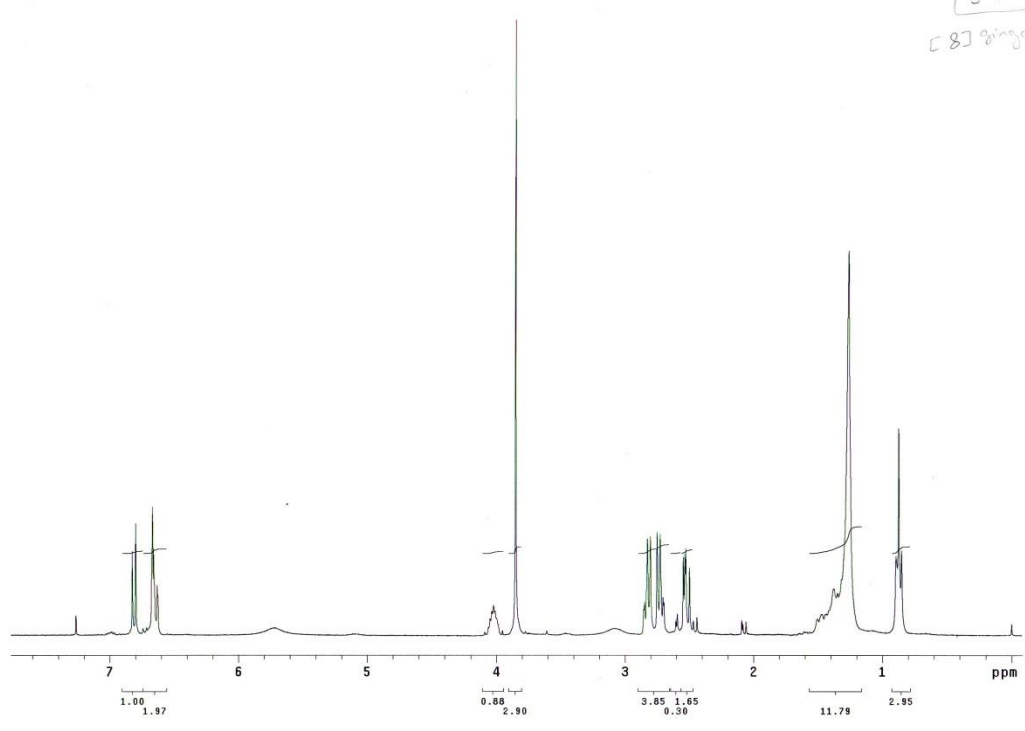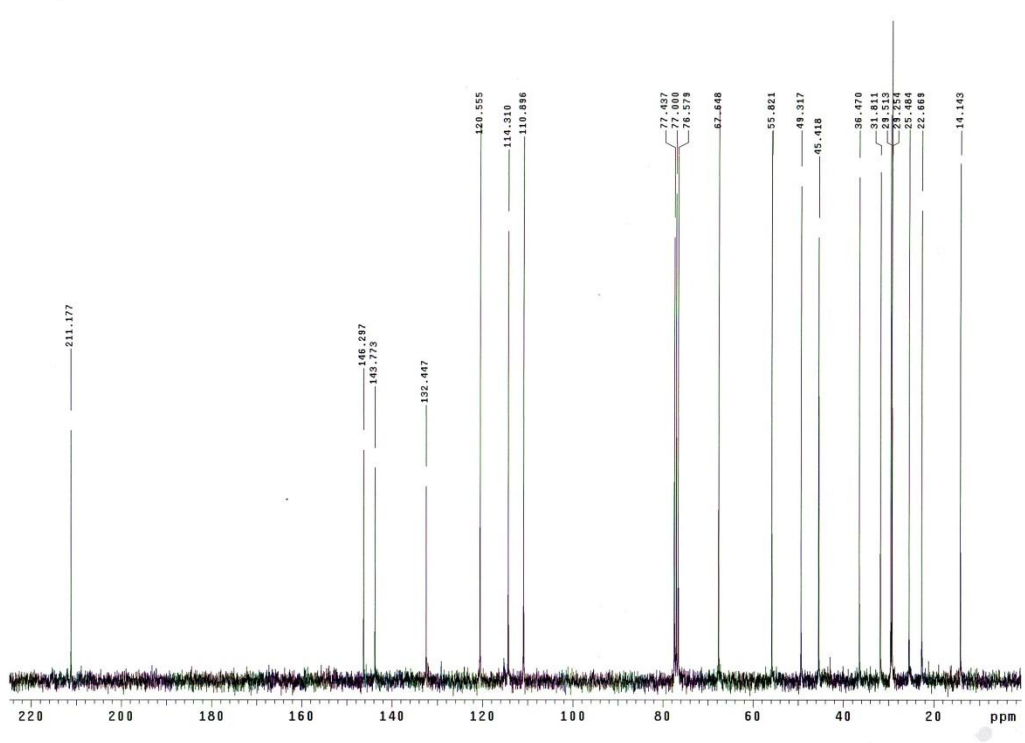

2007/12/19

Page 1

File: LR00  
Sample: 3-7-3  
Instrument: JEOL GCmate  
Inlet: Direct Probe

Date Run: 2007-12-19 (Time Run: 20:44:07)

Ionization mode: EI+

8-gingerol

Scan: 65  
Base: m/z 137; 12.2%FS TIC: 2905988

R.T.: 1.62

#Ions: 2

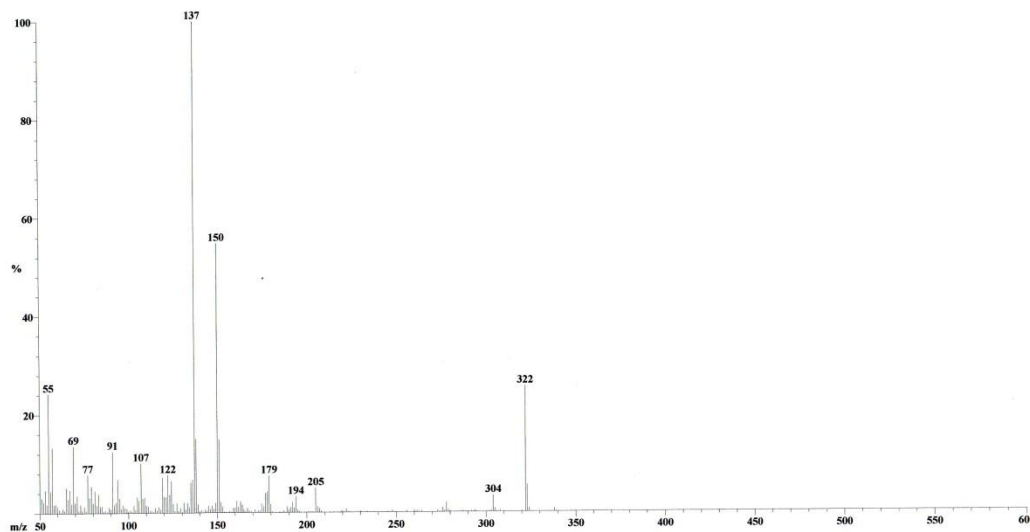

Figure S4.  $^1\text{H}$  and  $^{13}\text{C}$  NMR and MS charts of 8-gingerol (4)



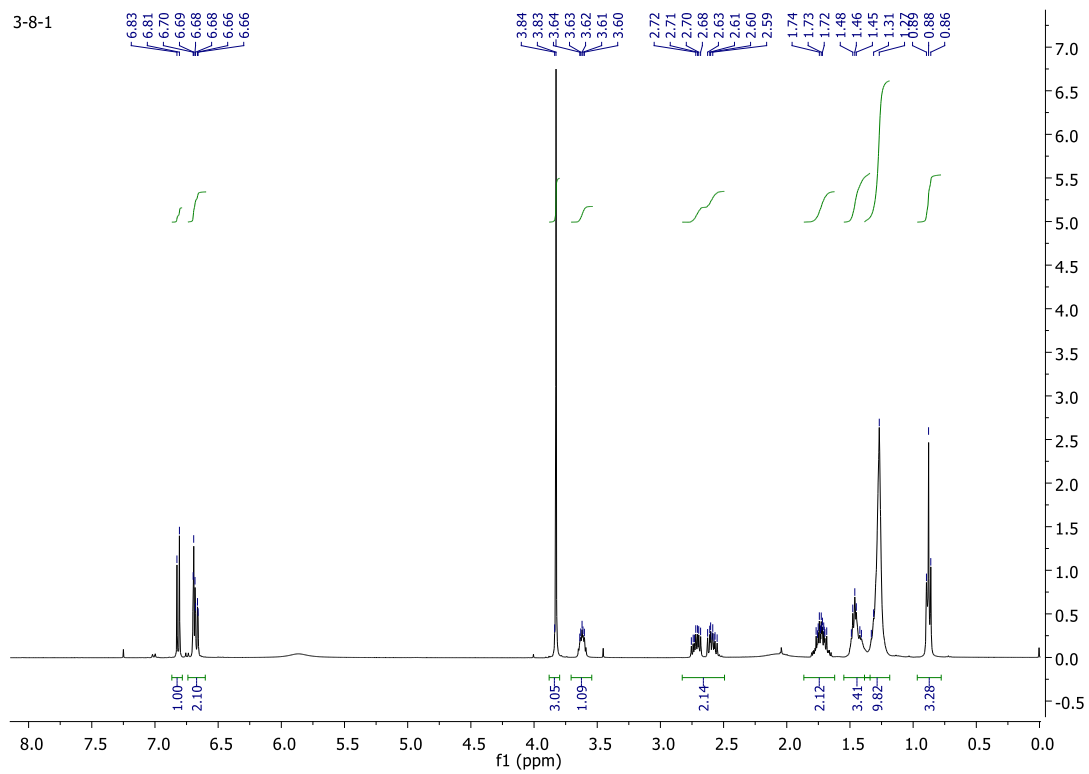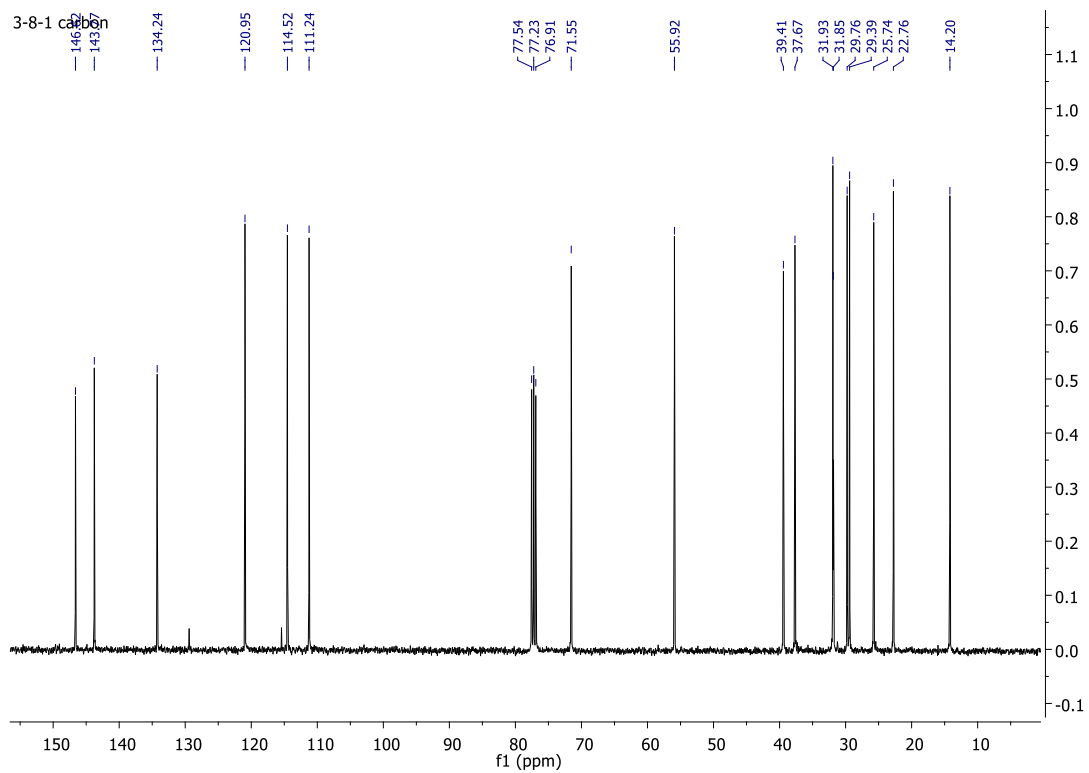

**Figure S5.**  $^1\text{H}$  and  $^{13}\text{C}$  NMR charts of dihydro-6-paradol (**5**)

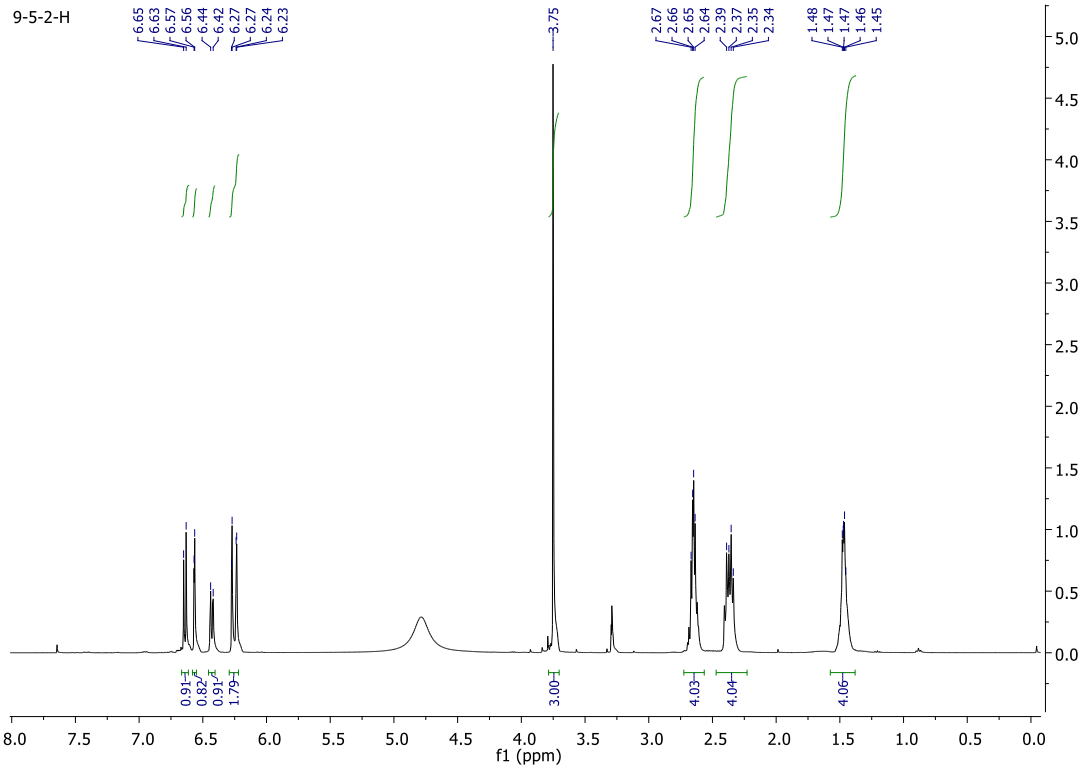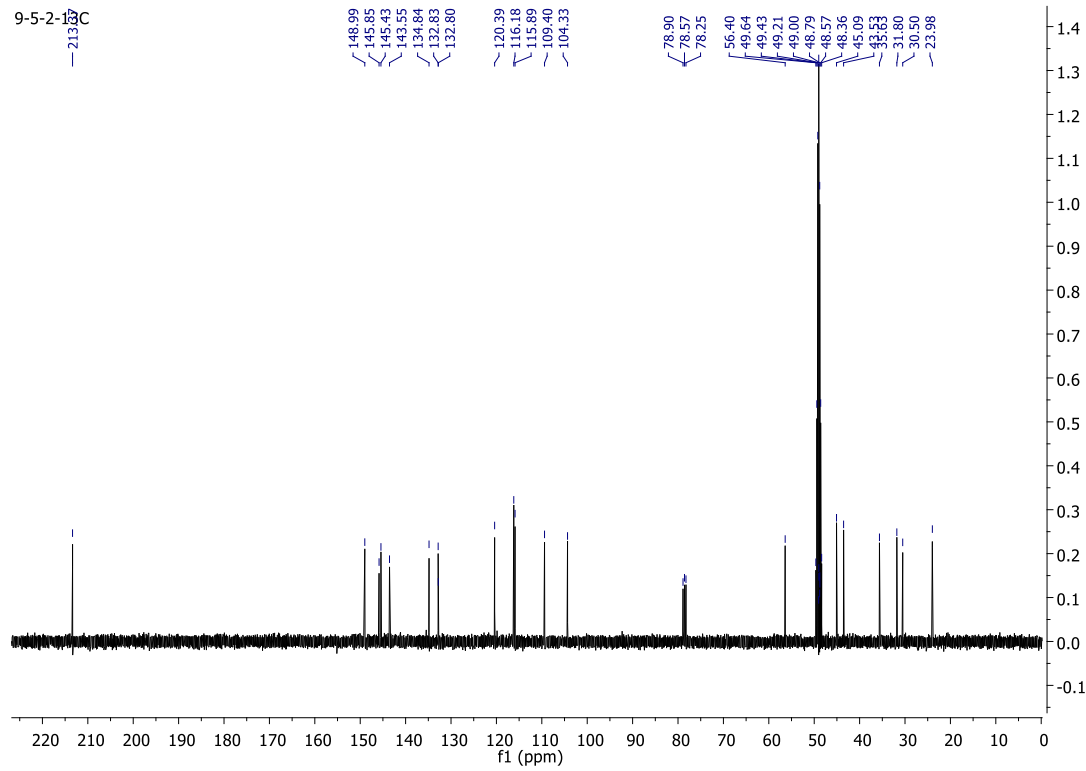

Scan: 160  
Base: m/z 153; 2.5%FS TIC: 1670832

R.T.: 4.02

#1or

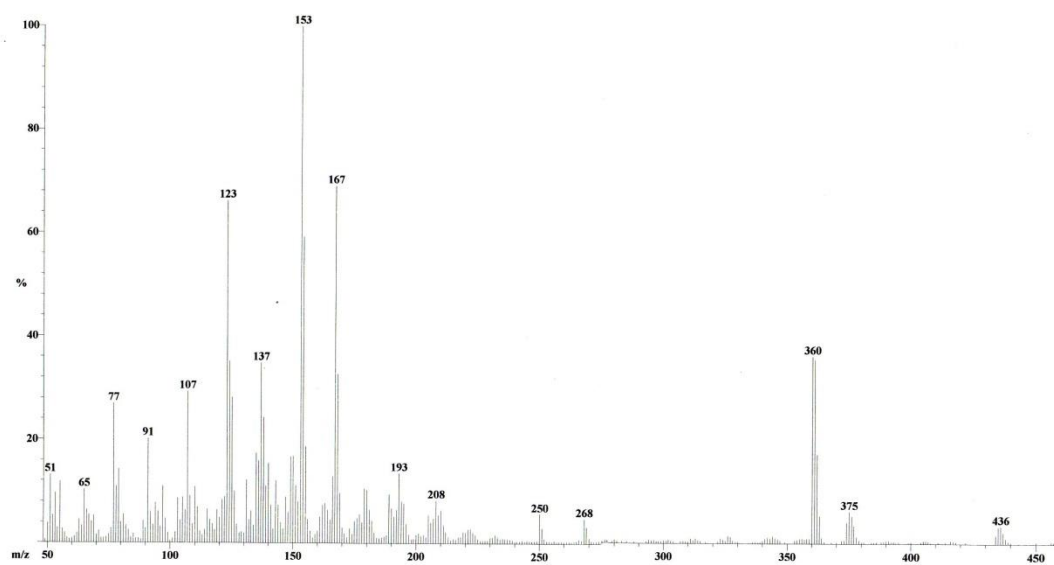

Figure S6.  $^1\text{H}$  and  $^{13}\text{C}$  NMR and Ms charts of dihydrogingerone-A (6)

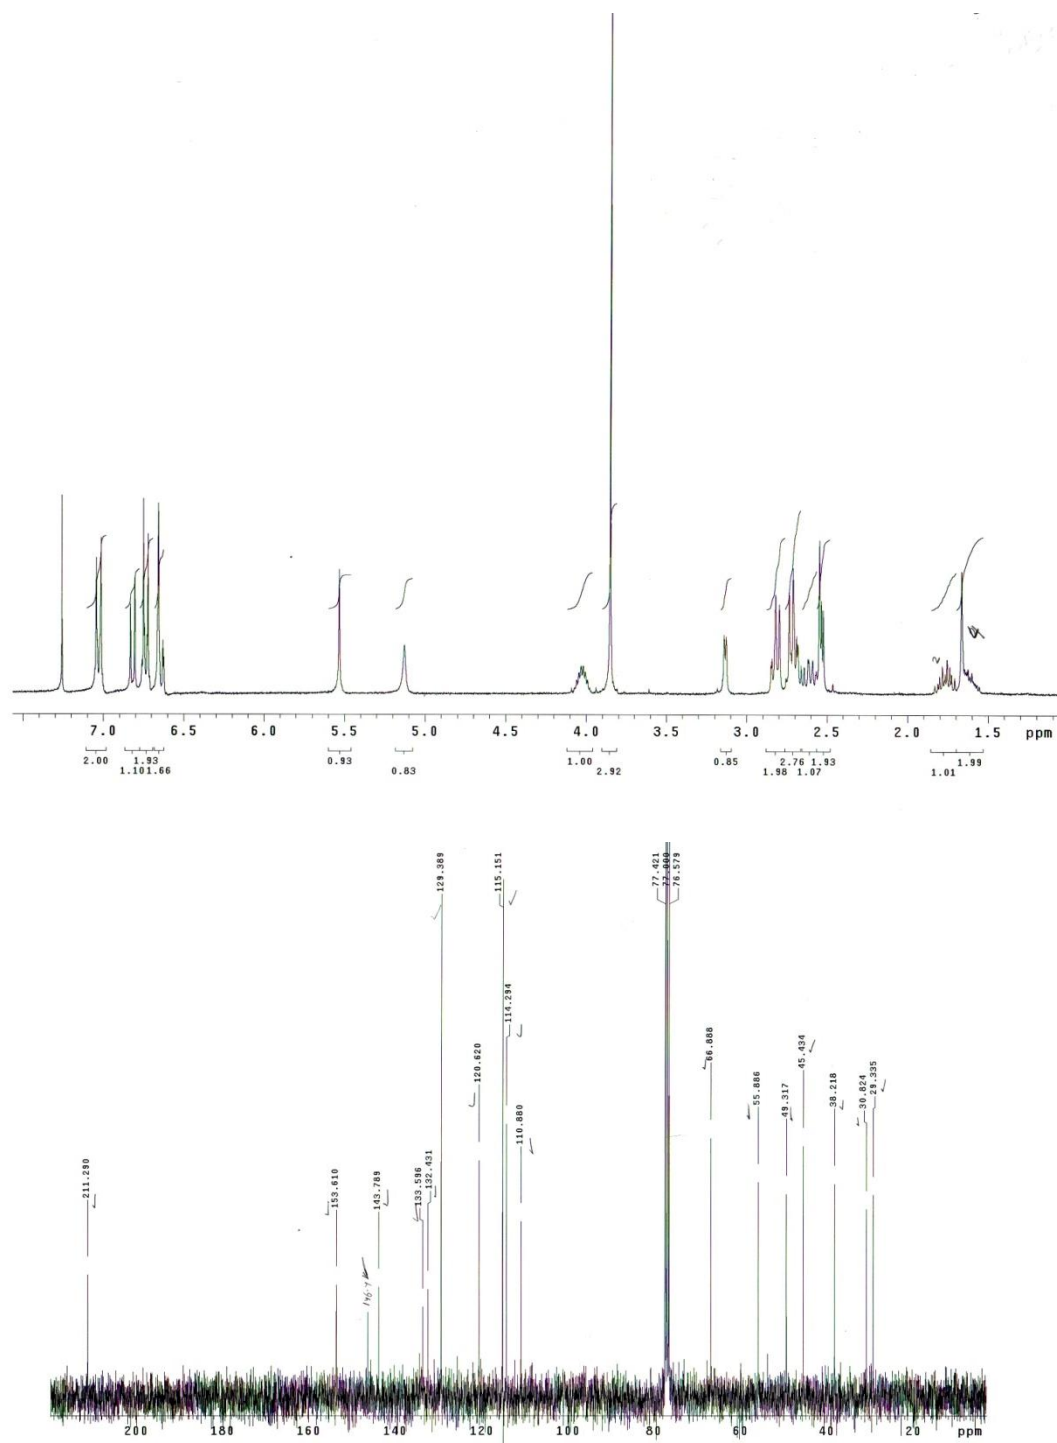

**Figure S7.**  $^1\text{H}$  and  $^{13}\text{C}$  NMR charts of dihydrogingerone-C (7)

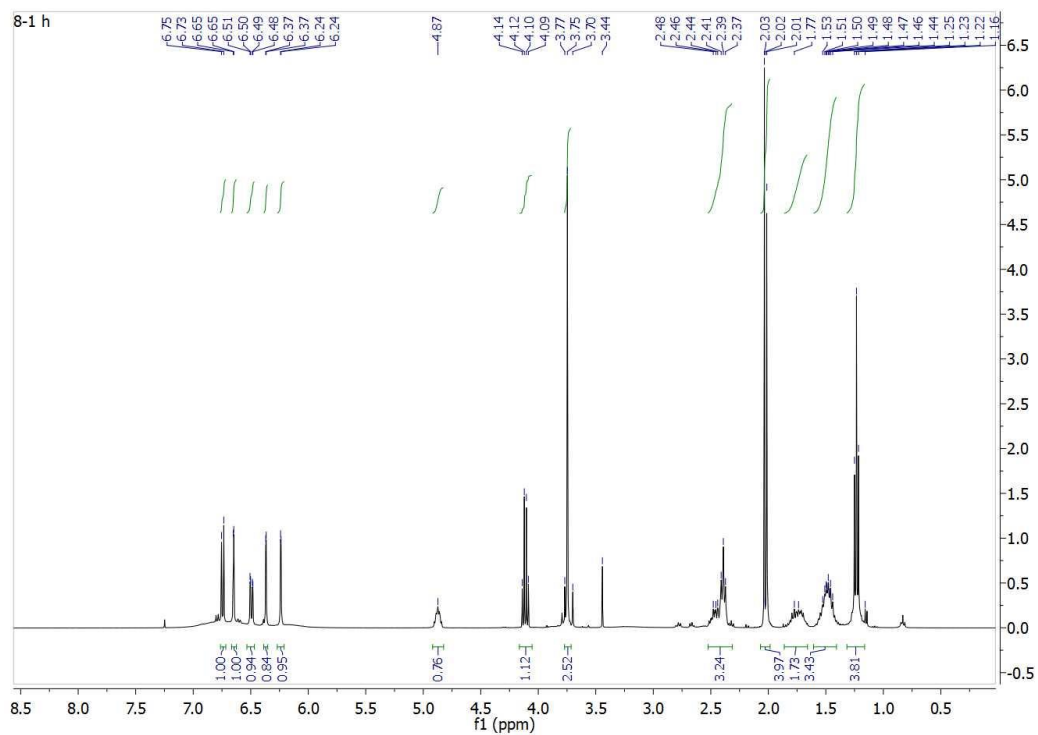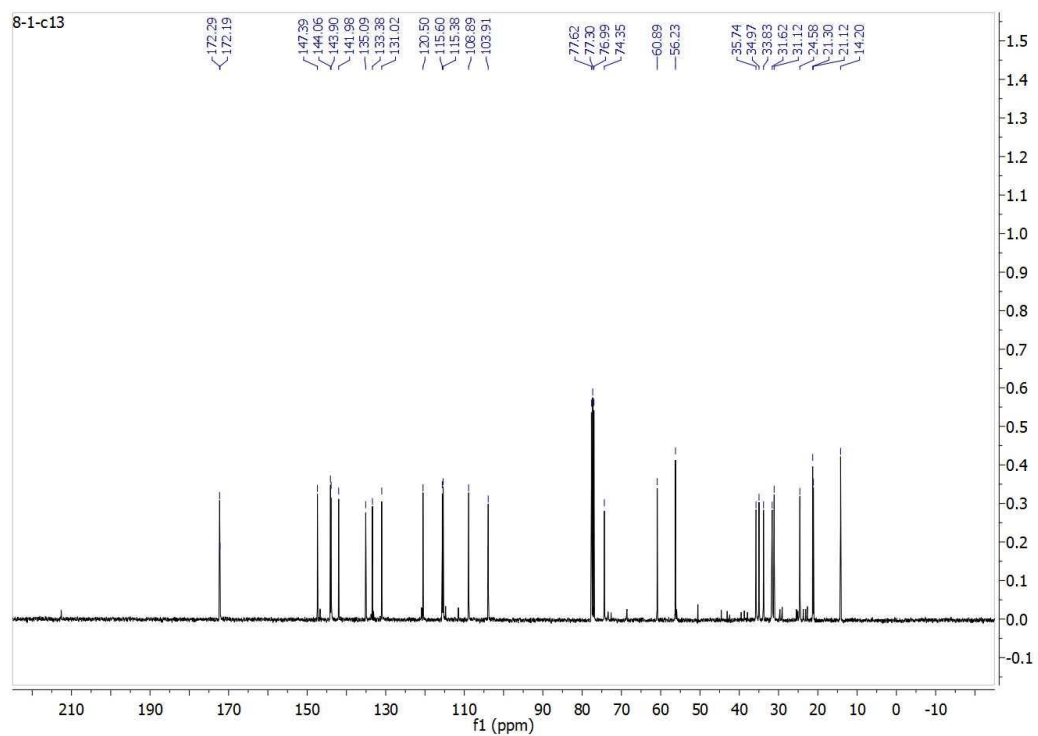

Figure S8.  $^1\text{H}$  and  $^{13}\text{C}$  NMR charts of compound **8**

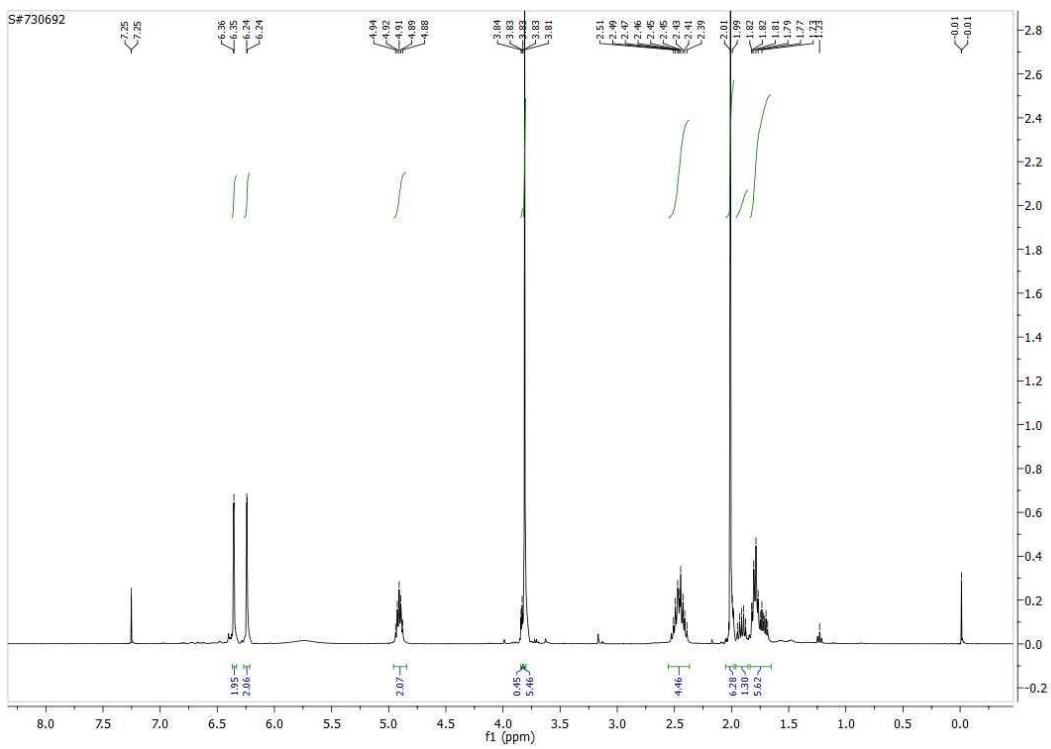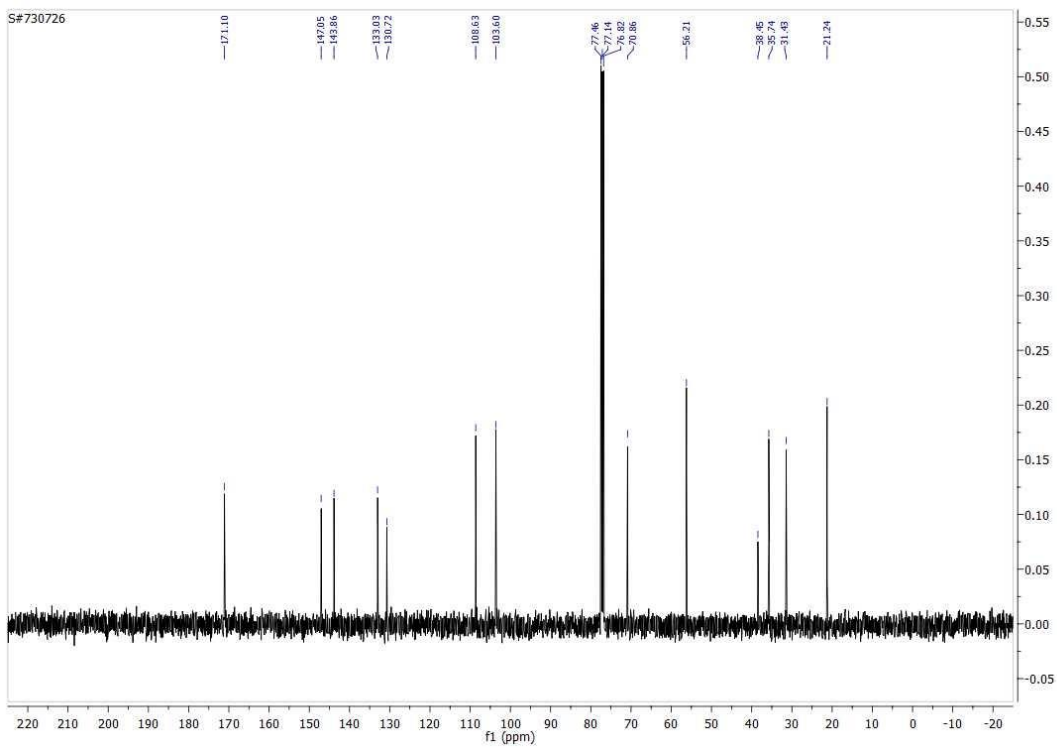

**Figure S9.**  $^1\text{H}$  and  $^{13}\text{C}$  NMR charts of **compound 9**

# Report of Specimen 1

Specimen Name: Specimen1

Run Time: 11/8/2016 2:22 PM

Cytometer: NovoCyte 451141011592

Software: NovoExpress 1.1.0

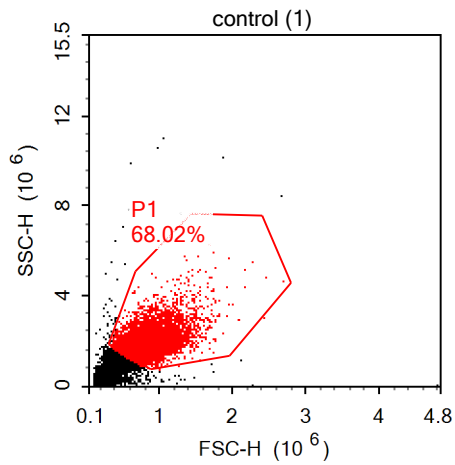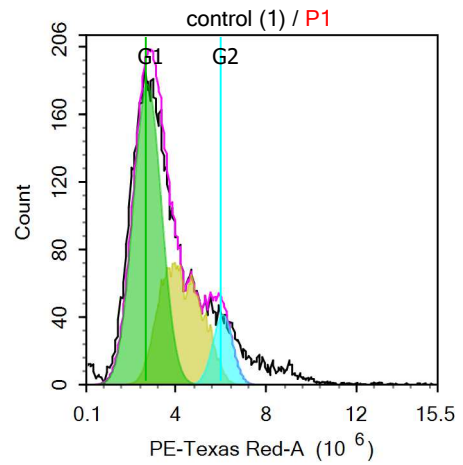

| Gate | Count  | % All    | Mean X  | Mean Y    |
|------|--------|----------|---------|-----------|
| All  | 12,000 | 100.00 % | 661,934 | 1,522,012 |
| P1   | 8,162  | 68.02 %  | 814,598 | 1,906,709 |

| RMS   | Freq G1 | Freq S | Freq G2 | G2/G1 | CV G1   |
|-------|---------|--------|---------|-------|---------|
| 11.50 | 52.54   | 31.35  | 8.67    | 2.21  | 22.48 % |

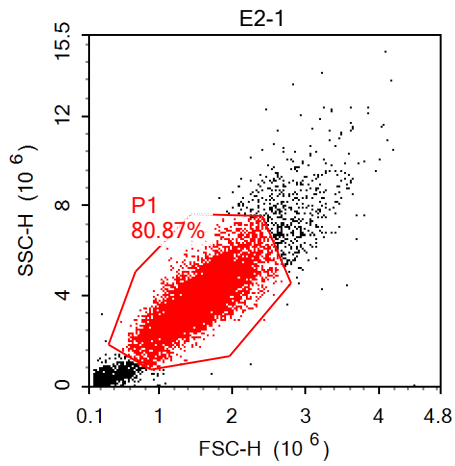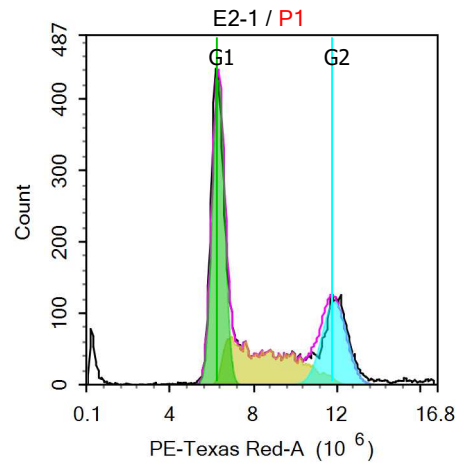

| Gate | Count  | % All    | Mean X    | Mean Y    |
|------|--------|----------|-----------|-----------|
| All  | 12,000 | 100.00 % | 1,356,756 | 3,379,520 |
| P1   | 9,704  | 80.87 %  | 1,478,921 | 3,699,377 |

| RMS   | Freq G1 | Freq S | Freq G2 | G2/G1 | CV G1  |
|-------|---------|--------|---------|-------|--------|
| 15.72 | 41.83   | 29.44  | 23.25   | 1.88  | 4.56 % |

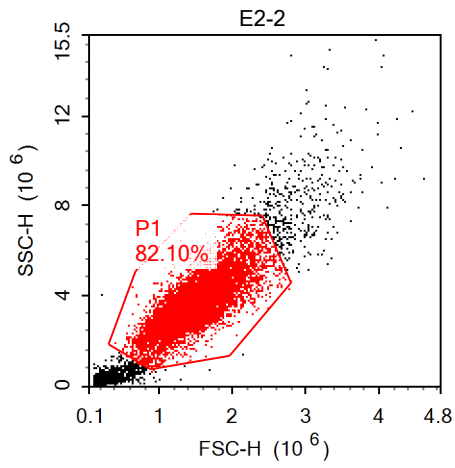

| Gate | Count  | % All    | Mean X    | Mean Y    |
|------|--------|----------|-----------|-----------|
| All  | 12,000 | 100.00 % | 1,362,533 | 3,343,269 |
| P1   | 9,852  | 82.10 %  | 1,484,045 | 3,647,778 |

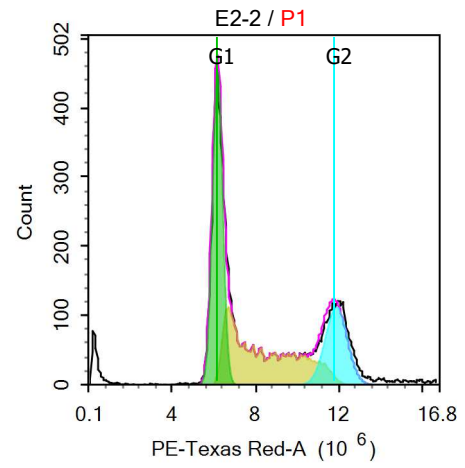

| RMS   | Freq G1 | Freq S | Freq G2 | G2/G1 | CV G1  |
|-------|---------|--------|---------|-------|--------|
| 11.04 | 36.81   | 36.63  | 19.89   | 1.92  | 3.92 % |

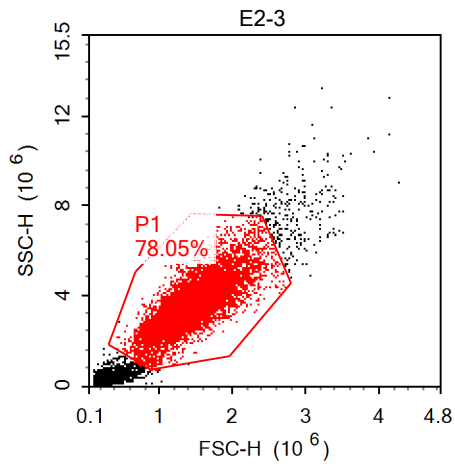

| Gate | Count  | % All    | Mean X    | Mean Y    |
|------|--------|----------|-----------|-----------|
| All  | 12,000 | 100.00 % | 1,244,211 | 3,028,538 |
| P1   | 9,366  | 78.05 %  | 1,441,499 | 3,563,016 |

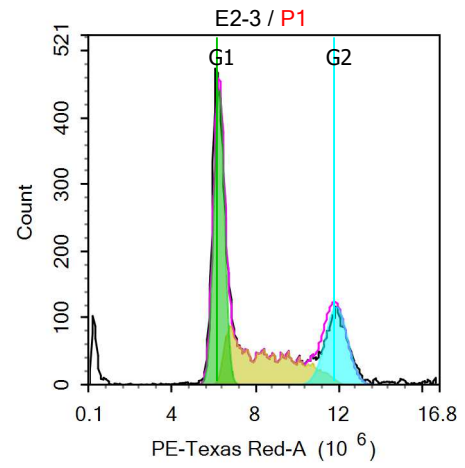

| RMS   | Freq G1 | Freq S | Freq G2 | G2/G1 | CV G1  |
|-------|---------|--------|---------|-------|--------|
| 16.50 | 39.07   | 32.04  | 21.73   | 1.90  | 4.02 % |



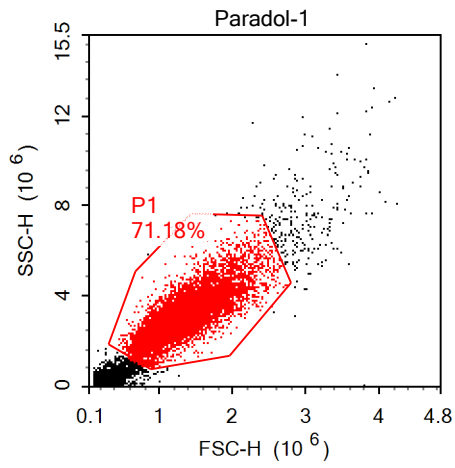

| Gate | Count  | % All    | Mean X    | Mean Y    |
|------|--------|----------|-----------|-----------|
| All  | 12,000 | 100.00 % | 1,099,213 | 2,490,806 |
| P1   | 8,542  | 71.18 %  | 1,363,014 | 3,175,923 |

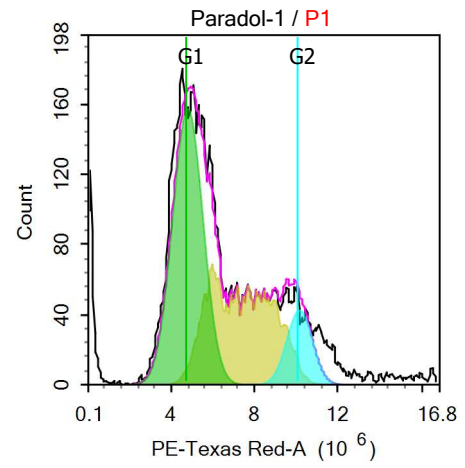

| RMS   | Freq G1 | Freq S | Freq G2 | G2/G1 | CV G1   |
|-------|---------|--------|---------|-------|---------|
| 10.77 | 41.79   | 34.58  | 9.56    | 2.11  | 15.06 % |

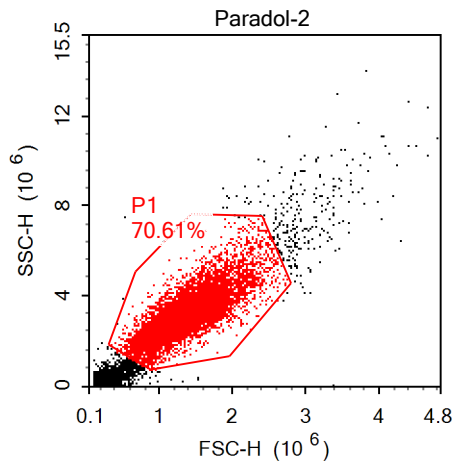

| Gate | Count  | % All    | Mean X    | Mean Y    |
|------|--------|----------|-----------|-----------|
| All  | 12,000 | 100.00 % | 1,094,594 | 2,489,568 |
| P1   | 8,473  | 70.61 %  | 1,359,290 | 3,180,320 |

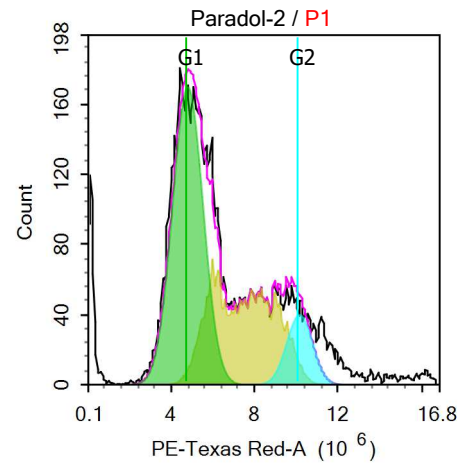

| RMS   | Freq G1 | Freq S | Freq G2 | G2/G1 | CV G1   |
|-------|---------|--------|---------|-------|---------|
| 10.63 | 44.84   | 33.32  | 8.93    | 2.11  | 15.06 % |

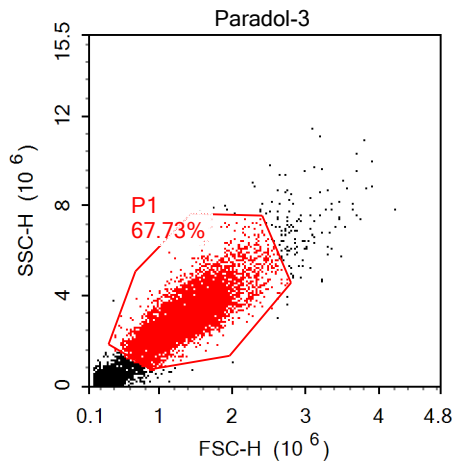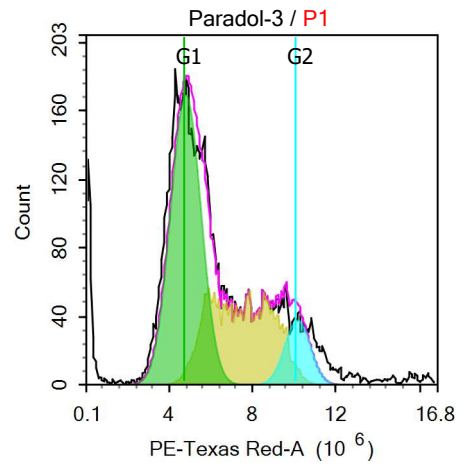

| Gate | Count  | % All    | Mean X    | Mean Y    |
|------|--------|----------|-----------|-----------|
| All  | 12,000 | 100.00 % | 1,007,418 | 2,248,819 |
| P1   | 8,127  | 67.73 %  | 1,324,895 | 3,076,992 |

| RMS   | Freq G1 | Freq S | Freq G2 | G2/G1 | CV G1   |
|-------|---------|--------|---------|-------|---------|
| 11.48 | 46.88   | 32.19  | 8.85    | 2.11  | 15.06 % |
